# Supplementary material for: Interaction of Soybean (Glycine max (L.) Merr.) Class II ACBPs with MPK2 and SAPK2 Kinases: New Insights into the Regulatory Mechanisms of Plant ACBPs
Source: MDPI journal article supplement (doi:10.3390/plants13081146), 2024-04-19
Supplement: s1 [file s1]

**Table S1. Sequences of primers for generation Y2H, BiFC and *in vitro* kinase assay constructs.**

| Name   | Nucleotide sequence from 5' to 3' <sup>a</sup>              | Orientation | Use                                        |
|--------|-------------------------------------------------------------|-------------|--------------------------------------------|
| ML3564 | CCGGAATTCCTCTCAAAGACGACAATCTC ( <i>EcoRI</i> )              | Forward     | In generation of plasmids pAT1103, pAT1114 |
| ML3565 | CGCGGATCCCTCAATTTACTTCTCCCCCACA ( <i>BamHI</i> )            | Reverse     | In generation of plasmid pAT1103           |
| ML3566 | CCGGAATTCCTCTCAAAGACGACAATCTC ( <i>EcoRI</i> )              | Forward     | In generation of plasmids pAT1104, pAT1115 |
| ML3567 | CGCGGATCCCTCAATTTACTTCTCCCCCACA3 ( <i>BamHI</i> )           | Reverse     | In generation of plasmid pAT1104           |
| ML3568 | CCCCCGGGGATGTACAGAGAGCGAGGAGG ( <i>XmaI</i> )               | Forward     | In generation of plasmid pAT1096           |
| ML3569 | CCGCTCGAGTCAGGGCTTGTGAAGTTTGA ( <i>XhoI</i> )               | Reverse     | In generation of plasmid pAT1096           |
| ML3570 | CCGGAATTCATGCAGAAGCATGGTTTT ( <i>EcoRI</i> )                | Forward     | In generation of plasmid pAT1097           |
| ML3571 | CCGCTCGAGTCAAGAAGAGTCTTTGTCTTT ( <i>XhoI</i> )              | Reverse     | In generation of plasmid pAT1097           |
| ML3572 | CCGGAATTCATGGAAGGAGGAGGAGCTG ( <i>EcoRI</i> )               | Forward     | In generation of plasmid pAT1098           |
| ML3573 | CCGCTCGAGCTACTGCTGATACTCAGGGTTAAA ( <i>XhoI</i> )           | Reverse     | In generation of plasmid pAT1098           |
| ML3574 | CGCGGATCCCGATGGA AAAACAATGGTGCTGA ( <i>BamHI</i> )          | Forward     | In generation of plasmid pAT1099           |
| ML3575 | CCGCTCGAGCTATTCCAACATCTGATGATCCT ( <i>XhoI</i> )            | Reverse     | In generation of plasmid pAT1099           |
| ML3576 | CCGGAATTCATGGAGCGCTATGAGATCCT ( <i>EcoRI</i> )              | Forward     | In generation of plasmid pAT1100           |
| ML3577 | CCGCTCGAGTTAAATAGGACACACAAATTCAC ( <i>XhoI</i> )            | Reverse     | In generation of plasmid pAT1100           |
| ML3578 | CGCGGATCCCGATGGAACGGTATGAGAT ( <i>BamHI</i> )               | Forward     | In generation of plasmid pAT1101           |
| ML3579 | CCGCTCGAGTCACAATGCACAGACAA ( <i>XhoI</i> )                  | Reverse     | In generation of plasmid pAT1101           |
| ML3580 | CCGGAATTCATGGATCGGGCGGCGTTGAC ( <i>EcoRI</i> )              | Forward     | In generation of plasmid pAT1102           |
| ML3581 | CCGCTCGAGCTATATGGCATACTATCTC ( <i>XhoI</i> )                | Reverse     | In generation of plasmid pAT1102           |
| ML3608 | CGCGGATCCCTCCATTTGTGAGTCACTGC ( <i>BamHI</i> )              | Reverse     | In generation of plasmid pAT1114           |
| ML3609 | CCGGAATTCGCCATTCATGGATTGCGCAG ( <i>EcoRI</i> )              | Forward     | In generation of plasmid pAT1116           |
| ML3610 | CGCGGATCCGTTTGACTCACAGATGTCACG ( <i>BamHI</i> )             | Reverse     | In generation of plasmid pAT1116           |
| ML3611 | CCGTCTAGAAATGGAAGGAGGAGGAGCTG ( <i>XbaI</i> )               | Forward     | In generation of plasmid pAT1119           |
| ML3612 | CGCGGATCCCGGGCCCTACTGCTGATACTCAGGGTTA<br>A ( <i>BamHI</i> ) | Reverse     | In generation of plasmid pAT1119           |
| ML3613 | CGCGGATCCATGGAACGGTATGAGAT ( <i>BamHI</i> )                 | Forward     | In generation of plasmid pAT1120           |
| ML3614 | CCGCTCGAGCGGGCCTCACAATGCACAgACAA ( <i>XhoI</i> )            | Reverse     | In generation of plasmid pAT1120           |
| ML3615 | CCGCTCGAGATGGAAGGAGGAGGAGCTG ( <i>XhoI</i> )                | Forward     | In generation of plasmid pAT1121           |
| ML3616 | CGCGAATTCCTACTGCTGATACTCAGGGTTAAA ( <i>EcoRI</i> )          | Reverse     | In generation of plasmid pAT1121           |
| ML3617 | CGCCTCGAGATGGAACGGTATGAGAT ( <i>XhoI</i> )                  | Forward     | In generation of plasmid pAT1122           |
| ML3618 | CGCCTCGAGATGGAACGGTATGAGAT ( <i>XhoI</i> )                  | Reverse     | In generation of plasmid pAT1122           |
| ML3150 | CTCGAGGACGACAATCTCACCGTCAC ( <i>XhoI</i> )                  | Forward     | In generation of plasmid pAT963            |
| ML3129 | TGGGGGAAGAAGTAAATTGACTCGAG ( <i>XhoI</i> )                  | Reverse     | In generation of plasmid pAT963            |

<sup>a</sup> Restriction sites are underlined and shown in parentheses.

**Table S2. Kinase-specific phosphorylation sites of Class II GmACBPs predicted by GPS 6.0.**

| Phosphosite position | Code | Phosphopeptide sequence <sup>a</sup> | Score  | Kinase family |
|----------------------|------|--------------------------------------|--------|---------------|
| 49                   | T    | AAAETTTTTRDDAVS                      | 0.0615 | CK            |
| 57                   | S    | TRDDAVSSDARPFEE                      | 0.3391 | CK            |
| 78                   | S    | HGSRVNDSDGDYDDD                      | 0.4620 | CK            |
| 120                  | S    | RLSQKVSSDVQLQLY                      | 0.0784 | CK            |
| 140                  | T    | ATEGPCSTPQPSPLK                      | 0.2057 | CK            |
| 179                  | T    | YIDIVTETYPTWLDG                      | 0.0536 | AGC           |
| 182                  | T    | IVTETYPTWLDGSSL                      | 0.0533 | AGC           |
| 193                  | S    | GSSLRNKSGDSGGHG                      | 0.3440 | CK            |
| 250                  | S    | KCIENGVS MNLKDSE                     | 0.0910 | CK            |
| 256                  | S    | VSMNLKDS EGRTPLH                     | 0.1242 | CK            |

<sup>a</sup> Phosphorylation sites are in red.

**Table S3. Kinase-specific phosphorylation sites of Class II GmACBPs predicted by EPSD 1.0.**

| Phosphosite position | Code | Phosphopeptide sequence <sup>a</sup> | Score | Kinase family |
|----------------------|------|--------------------------------------|-------|---------------|
| 56                   | S    | TTRDDAVSSDARPFEE                     | 0.007 | AGC/CK        |
| 57                   | S    | TRDDAVSSDARPFEE                      | 0.007 | CK            |
| 66                   | S    | ARPFEEESMVAEHGS                      | 0.997 | CK            |
| 73                   | S    | SMVAEHGSRVNDSDG                      | 1     | AGC           |
| 78                   | S    | HGSRVNDSDGDYDDD                      | 1     | CK/AGC        |

<sup>a</sup> Phosphorylation sites are in red.

**Table S4.** Kinase-specific phosphorylation sites of Class II GmACBPs predicted by NetPhos 3.1.

| Phosphosite position | Code | Phosphopeptide sequence <sup>a</sup> | Score             | Kinase family |
|----------------------|------|--------------------------------------|-------------------|---------------|
| 18                   | S    | GLIFSYLLA                            | 0.539             | CLK           |
| 30                   | S    | SIVVSFKDD                            | 0.707             | AGC           |
| 37                   | T    | DDNLTVTRA                            | 0.438             | AGC           |
| 49                   | T    | ETTTTRDD                             | 0.5               | AGC           |
| 56                   | S    | DDAVSSDAR                            | 0.616/0.576       | AGC /CK       |
| 57                   | S    | DAVSSDARP                            | 0.566             | CK            |
| 66                   | S    | FEEESMVAE                            | 0.509             | CK            |
| 78                   | S    | VRNDSGDY                             | 0.583             | AGC           |
| 92                   | S    | EGVESTELD                            | 0.689             | CK            |
| 93                   | T    | GVESTELDE                            | 0.625             | CK            |
| 115                  | S    | ADRLSQKVS                            | 0.822/0.665       | AGC /PIKK     |
| 120                  | S    | QKVSSDVQL                            | 0.625             | CK            |
| 140                  | T    | GPCSTPQPS                            | 0.588/0.585/0.502 | CDK/MAPK/GSK  |
| 144                  | S    | TPQPSPLKM                            | 0.642/0.5         | CDK/ GSK      |
| 149                  | T    | PLKMTARAK                            | 0.779             | AGC           |
| 187                  | S    | WLDGSSLRN                            | 0.697             | AGC           |
| 188                  | S    | LDGSSLRNK                            | 0.803             | AGC           |
| 193                  | S    | LRNKSGDSG                            | 0.515             | AGC           |
| 213                  | T    | PVFSTFVYE                            | 0.553             | CK            |
| 222                  | S    | EEYGSDSQM                            | 0.644/0.515       | CK/CLK        |
| 224                  | S    | YGSDSQMEA                            | 0.633/0.632       | CK/PIKK       |
| 256                  | S    | NLKDSEGR                             | 0.995             | CK            |
| 293                  | T    | NDGQTPLHY                            | 0.501             | MAPK          |
| 319                  | S    | ADIIYSKDND                           | 0.525             | CK            |

<sup>a</sup> Phosphorylation sites are in red.

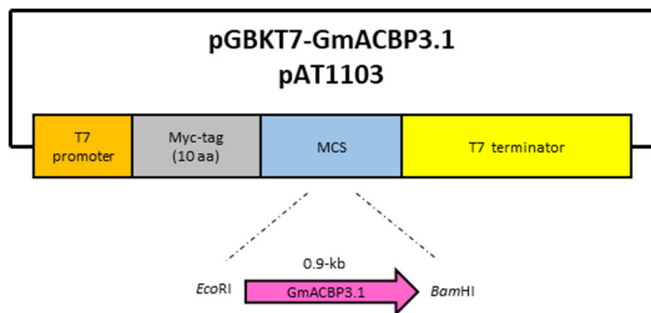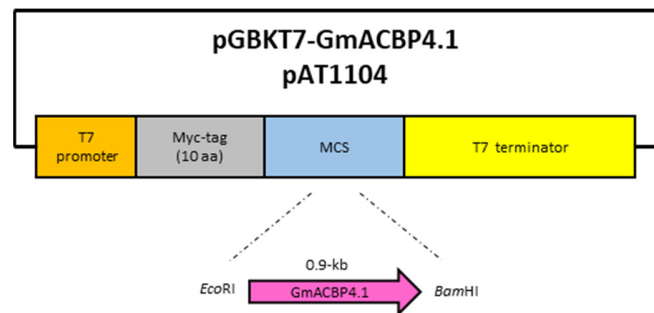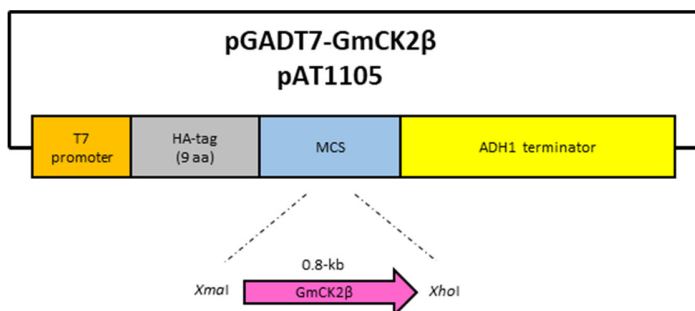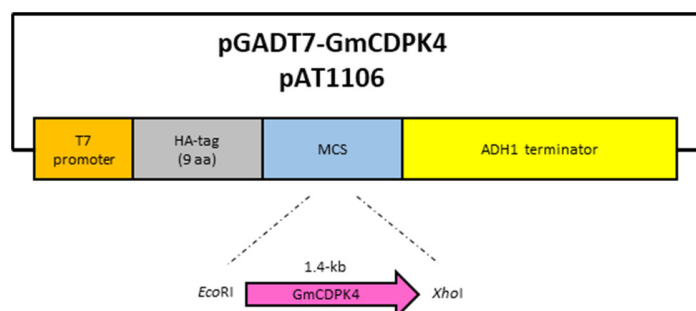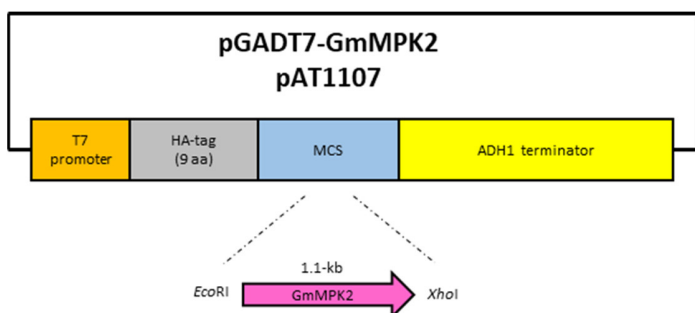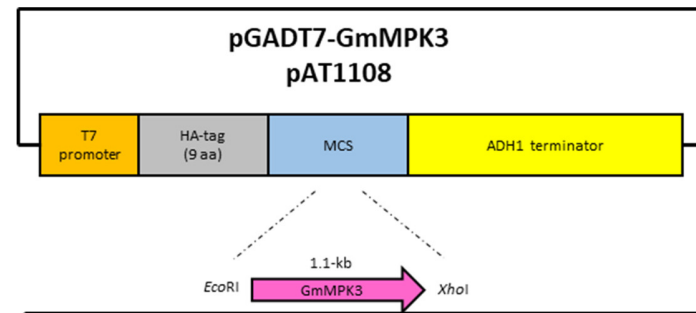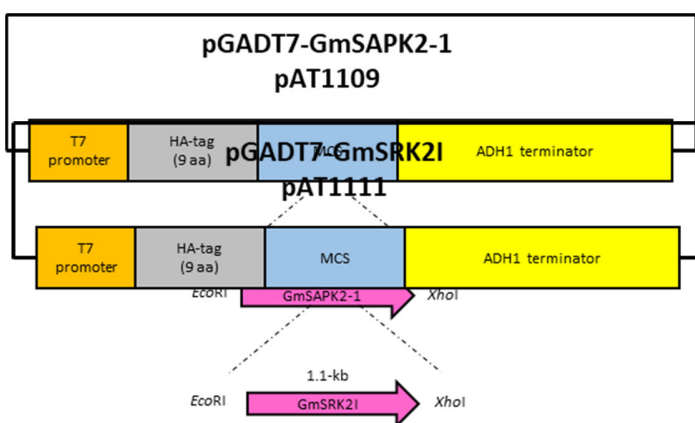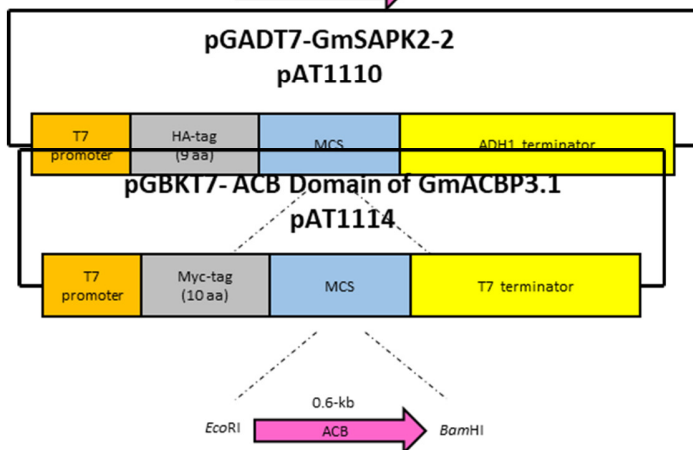

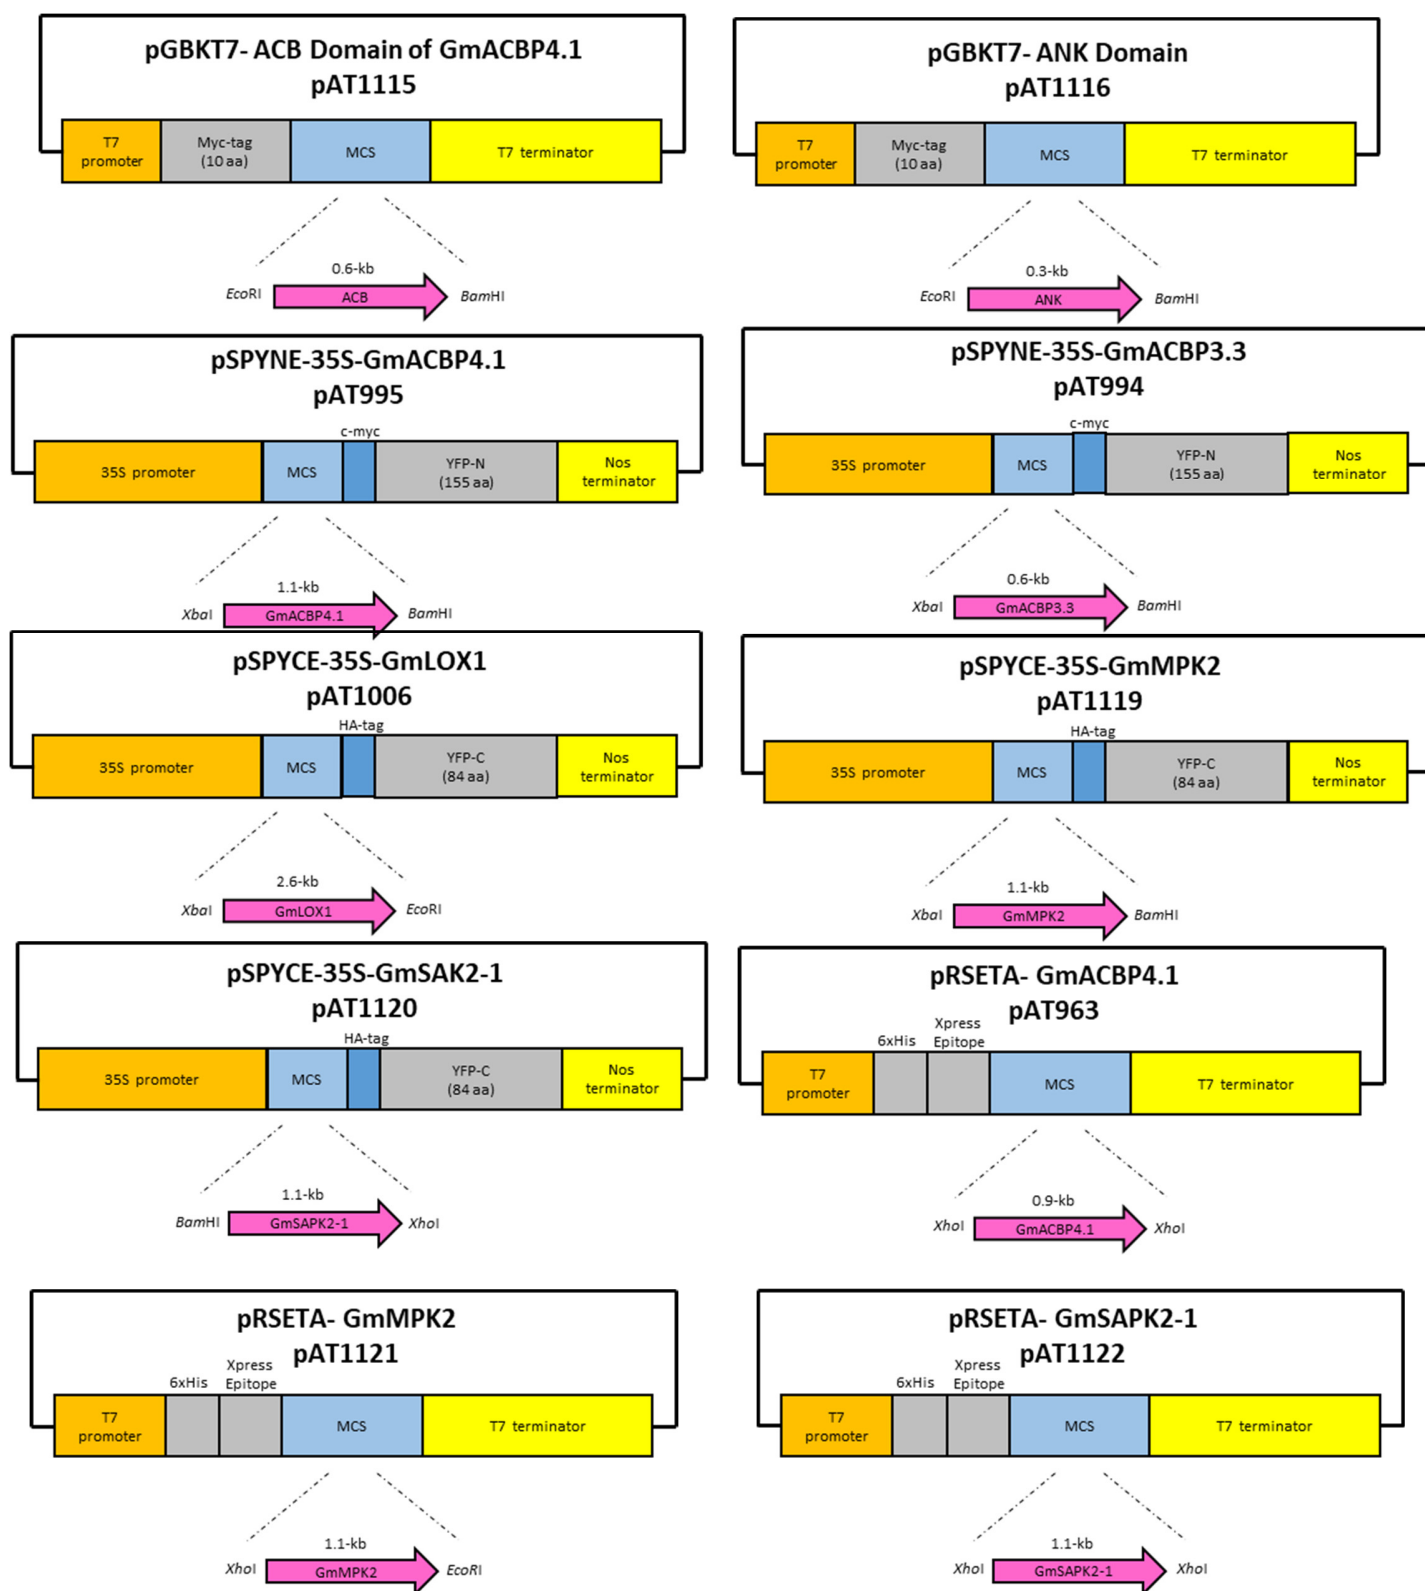

**Figure S1.** This figure represents all constructs used in this study, including Y2H, BiFC and *in vitro* kinase assays.
